# Supplementary material
Source: PubMed Central journal article supplement (PMC4499247)
Supplement: anie0053-2673-sd1.pdf [file anie0053-2673-sd1.pdf]

Supporting Information

© Wiley-VCH 2014

69451 Weinheim, Germany

**Stimuli-Responsive Microjets with Reconfigurable Shape\*\***

*Veronika Magdanz, Georgi Stoychev, Leonid Ionov,\* Samuel Sanchez,\* and Oliver. G. Schmidt*

anie\_201308610\_sm\_miscellaneous\_information.pdf

## Supporting Information

### 5 Movies:

z308610\_VideoS2c.avi

z308610\_VideoS4a.avi

z308610\_VideoS4b.avi

z308610\_VideoS2a.avi

z308610\_ViedoS2b.avi
